## Standards of Medical Care in Diabetes—2019

- S1 **Introduction**
- S3 **Professional Practice Committee**
- S4 **Summary of Revisions: *Standards of Medical Care in Diabetes—2019***
- S7 **1. Improving Care and Promoting Health in Populations**  
Diabetes and Population Health  
Tailoring Treatment for Social Context
- S13 **2. Classification and Diagnosis of Diabetes**  
Classification  
Diagnostic Tests for Diabetes  
A1C  
Type 1 Diabetes  
Prediabetes and Type 2 Diabetes  
Gestational Diabetes Mellitus  
Cystic Fibrosis–Related Diabetes  
Posttransplantation Diabetes Mellitus  
Monogenic Diabetes Syndromes
- S29 **3. Prevention or Delay of Type 2 Diabetes**  
Lifestyle Interventions  
Pharmacologic Interventions  
Prevention of Cardiovascular Disease  
Diabetes Self-management Education and Support
- S34 **4. Comprehensive Medical Evaluation and Assessment of Comorbidities**  
Patient-Centered Collaborative Care  
Comprehensive Medical Evaluation  
Assessment of Comorbidities
- S46 **5. Lifestyle Management**  
Diabetes Self-management Education and Support  
Nutrition Therapy  
Physical Activity  
Smoking Cessation: Tobacco and e-Cigarettes  
Psychosocial Issues
- S61 **6. Glycemic Targets**  
Assessment of Glycemic Control  
A1C Goals  
Hypoglycemia  
Intercurrent Illness
- S71 **7. Diabetes Technology**  
Insulin Delivery  
Self-monitoring of Blood Glucose  
Continuous Glucose Monitors  
Automated Insulin Delivery
- S81 **8. Obesity Management for the Treatment of Type 2 Diabetes**  
Assessment  
Diet, Physical Activity, and Behavioral Therapy  
Pharmacotherapy  
Medical Devices for Weight Loss  
Metabolic Surgery
- S90 **9. Pharmacologic Approaches to Glycemic Treatment**  
Pharmacologic Therapy for Type 1 Diabetes  
Surgical Treatment for Type 1 Diabetes  
Pharmacologic Therapy for Type 2 Diabetes
- S103 **10. Cardiovascular Disease and Risk Management**  
Hypertension/Blood Pressure Control  
Lipid Management  
Antiplatelet Agents  
Cardiovascular Disease
- S124 **11. Microvascular Complications and Foot Care**  
Chronic Kidney Disease  
Diabetic Retinopathy  
Neuropathy  
Foot Care
- S139 **12. Older Adults**  
Neurocognitive Function  
Hypoglycemia  
Treatment Goals  
Lifestyle Management  
Pharmacologic Therapy  
Treatment in Skilled Nursing Facilities and Nursing Homes  
End-of-Life Care
- S148 **13. Children and Adolescents**  
Type 1 Diabetes  
Type 2 Diabetes  
Transition From Pediatric to Adult Care
- S165 **14. Management of Diabetes in Pregnancy**  
Diabetes in Pregnancy  
Preconception Counseling  
Glycemic Targets in Pregnancy  
Management of Gestational Diabetes Mellitus  
Management of Preexisting Type 1 Diabetes and Type 2 Diabetes in Pregnancy  
Pregnancy and Drug Considerations  
Postpartum Care
- S173 **15. Diabetes Care in the Hospital**  
Hospital Care Delivery Standards  
Glycemic Targets in Hospitalized Patients  
Bedside Blood Glucose Monitoring  
Antihyperglycemic Agents in Hospitalized Patients  
Hypoglycemia  
Medical Nutrition Therapy in the Hospital  
Self-management in the Hospital  
Standards for Special Situations  
Transition From the Acute Care Setting  
Preventing Admissions and Readmissions
- S182 **16. Diabetes Advocacy**  
Advocacy Statements
- S184 **Disclosures**
- S187 **Index**

This issue is freely accessible online at [care.diabetesjournals.org/content/42/Supplement\\_1](http://care.diabetesjournals.org/content/42/Supplement_1).

Keep up with the latest information for *Diabetes Care* and other ADA titles via Facebook ([/ADAJournals](https://www.facebook.com/ADAJournals)) and Twitter ([@ADA\\_Journals](https://twitter.com/ADA_Journals)).
